# Supplementary material for: Synthesis of Co/CeO2 hetero-particles with abundant oxygen-vacancies supported by carbon aerogels for ORR and OER
Source: Royal Society of Chemistry journal article supplement (doi:10.1039/d1nr07595k), 2022-01-01
Supplement: d1nr07595k1.pdf [file d1nr07595k1.pdf]

## Supplementary Information

### **Synthesis of Co/CeO<sub>2</sub> hetero-particles with abundant oxygen-vacancies supported by carbon aerogels for ORR and OER**

Zhenyuan Liu<sup>\*,†,a,b</sup>, Jinxin Wan<sup>†,a</sup>, Meng Li<sup>b</sup>, Zhaoping Shi<sup>b</sup>, Junhua Liu<sup>\*,b</sup>, Yawen Tang<sup>\*,b</sup>

<sup>a</sup> School of Materials Science and Engineering, Jiangsu University of Science and Technology, Zhenjiang 212100, China

<sup>b</sup> School of Chemistry and Materials Science, Nanjing Normal University, Nanjing 210023, China

\* Corresponding author: zhenyuanliu@just.edu.cn (Z. Liu);

liujh2007@aliyun.com (J. Liu);

tangyawen@nynu.edu.cn (Y. Tang).

† These authors contributed equally to this work.

## 1. Experimental

### 1.1. Materials and reagents

Cerium (III) chloride heptahydrate ( $\text{CeCl}_3 \cdot 7\text{H}_2\text{O}$ ), potassium hexacyanocobaltate (III) ( $\text{K}_3\text{Co}(\text{CN})_6$ ) and chitosan (CS, 85% deacetylate) were bought from Alfa Aesar. Ruthenium dioxide ( $\text{RuO}_2$ ) and commercial 20% Pt/C were purchased from Johnson Matthey Chemicals Ltd (Shanghai, China). All chemicals and reagents were utilized without further purification.

### 1.2. Preparation of Co-CeO<sub>2</sub>/C aerogels

Typically, 2 mL  $\text{CeCl}_3 \cdot 7\text{H}_2\text{O}$  (0.05 M) aqueous solutions were mixed with 2 mL  $\text{K}_3\text{Co}(\text{CN})_6$  (0.05 M) at room temperature, and then 10 mL aqueous solution containing chitosan ( $4 \text{ mg mL}^{-1}$ ) was added. The mixture was heated for 5 h at 50 °C after continuous ultrasonic treatment for 5 min, and then the homogeneous white  $\text{CeCl}_3/\text{K}_3\text{Co}(\text{CN})_6$ -CS hydrogels were formed. Subsequently, the  $\text{CeCl}_3/\text{K}_3\text{Co}(\text{CN})_6$ -CS hydrogels were freeze-dried for 24 h to obtain the  $\text{CeCl}_3/\text{K}_3\text{Co}(\text{CN})_6$ -CS aerogels. Under a flow of 5%  $\text{H}_2/\text{Ar}$  with a heating rate of 5 °C  $\text{min}^{-1}$ , the obtained aerogels were annealed for 3 h at 700 °C. After being cooled down to room temperature, the products were laved using distilled water and absolute alcohol to get rid of KCl and subsequently dried at 40 °C to obtain the Co-CeO<sub>2</sub>/C aerogels. Through the similar process of the preparation of Co-CeO<sub>2</sub>/C aerogels, we also synthesized the Co/C aerogels and CeO<sub>2</sub>/C aerogels for comparison.

### 1.3. Characterizations

The morphology and structure of products were examined on Hitachi S-4800 scanning electron microscopy (SEM) and JEOL JEM-2010 transmission electron microscopy (TEM). The phase purity and crystallinity of the products were identified by X-ray diffraction (XRD) on a Model D/max-rC X-ray diffractometer using Cu K $\alpha$  radiation source ( $\lambda = 1.5406 \text{ \AA}$ ) and operating at 40 kV and 100 mA. Energy-dispersive X-ray (EDX), high-angle annular dark-field scanning transmission electron

microscopy (HAADF-STEM) and elemental mapping measurements were performed on an FEI Tecnai G2 F20 microscope, which was built as an accessory on the JEOL JEM-2100F. The Brunauer-Emmett-Teller (BET) specific surface area and pore size distribution were measured at 77 K using a Micromeritics ASAP 2050 system. X-ray photoelectron spectroscopy (XPS) measurements carried out on a Thermo VG Scientific ESCALAB 250 spectrometer with a monochromatic Al K $\alpha$  X-ray source (1486.6 eV photons). The binding energy was calibrated with respect to C1s at 284.6 eV. The Fourier transform infrared (FT-IR) spectra were recorded with a Nicolet 520 SXFTIR spectrometer. Thermogravimetric analysis (TGA) of the product was carried out with a Netzsch STA 449C thermal analyser at a heating rate of 10 °C min<sup>-1</sup> under air atmosphere.

#### 1.4. Electrochemical measurements

All electrochemical tests were performed on the CHI 760E electrochemical workstation (CH Instruments, Shanghai Chenhua Co.). A standard three-electrode system was used, including a rotating disk electrode (RDE) or rotating ring-disk electrode (RRDE) modified with catalysts as the working electrode (0.196 cm<sup>2</sup>), a platinum foil as the auxiliary electrode and a saturated calomel electrode (SCE) protected by a Luggin capillary with a KCl solution as the reference electrode. All potentials were reported with respect to the reversible hydrogen electrode (RHE). The catalyst suspension was prepared by dispersing 5 mg of catalyst in 1 mL of solution containing 0.9 mL of distilled water and 0.1 mL of 0.5 wt.% Nafion solution followed by ultrasonication for 30 min. 10  $\mu$ L of the catalyst suspension was dropped onto the electrode and dried at room temperature (loading density of  $\sim$ 255  $\mu$ g cm<sup>-2</sup>). The oxygen reduction reaction and oxygen evolution reaction measurements were performed in O<sub>2</sub>-saturated 0.1 M KOH solution at a sweep rate of 5 mV s<sup>-1</sup> with a rotation speed of 1600 rpm. The electron transfer number ( $n$ ) is calculated based on the equation of  $n = 4I_d/(I_d + (I_r/N))$ , where  $I_d$  and  $I_r$  stand for the disk current and ring current, respectively, and  $N$  is the current collection efficiency of the Pt ring (0.37).

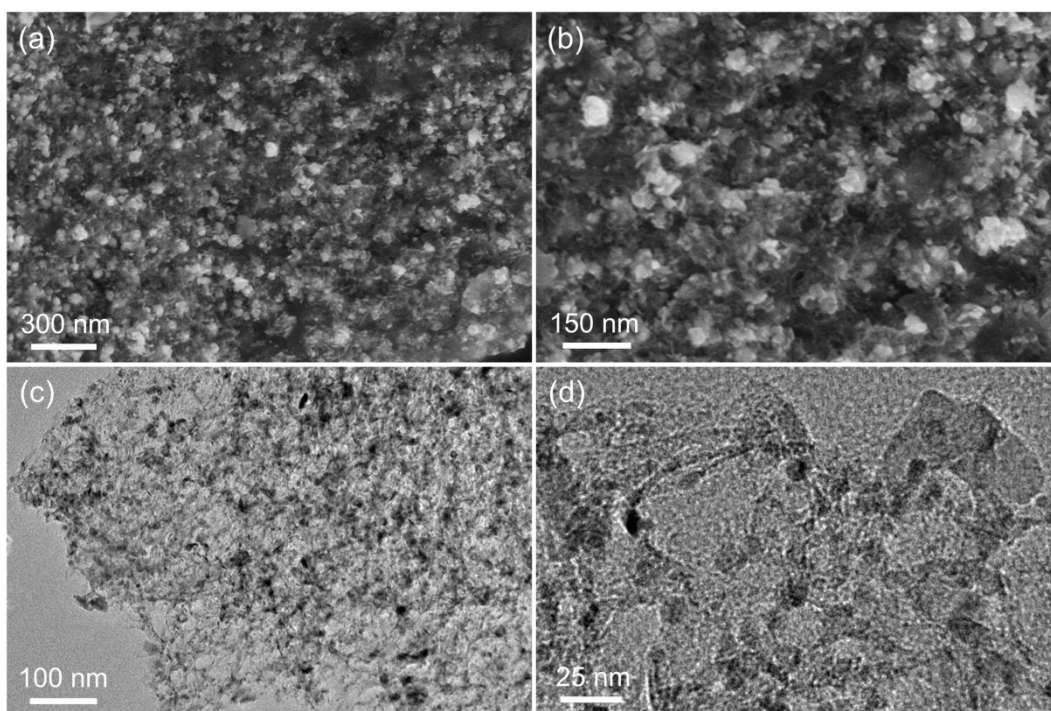

**Fig. S1** Typical (a-b) SEM images and (c-d) TEM images of the Co-CeO<sub>2</sub>/C aerogels at different magnifications.

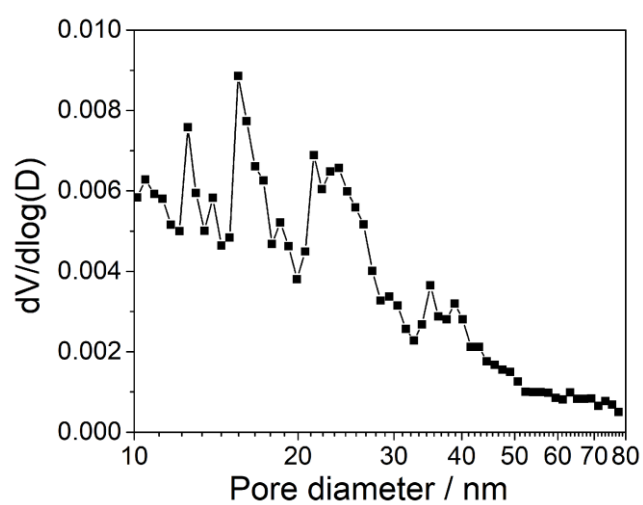

**Fig. S2** Pore distribution curves of the Co-CeO<sub>2</sub>/C aerogels.

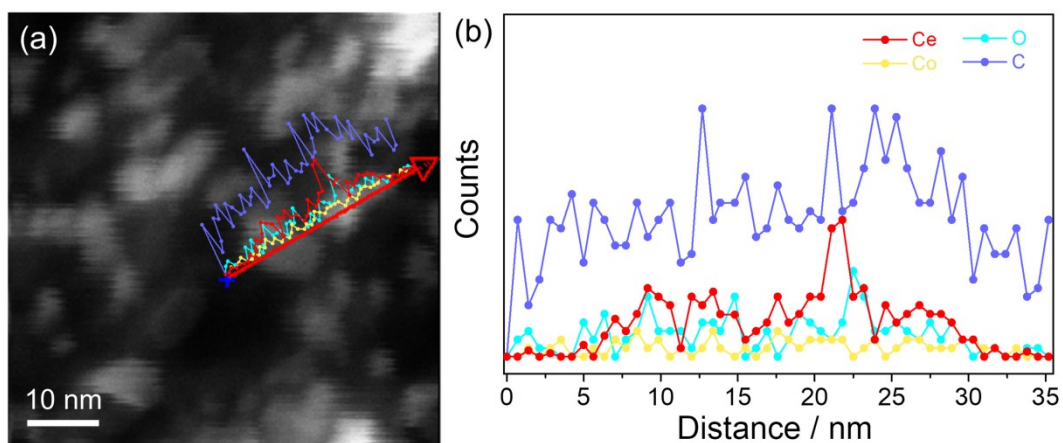

**Fig. S3** (a) STEM image and (b) EDX line scanning profile of the Co-CeO<sub>2</sub>/C aerogels.

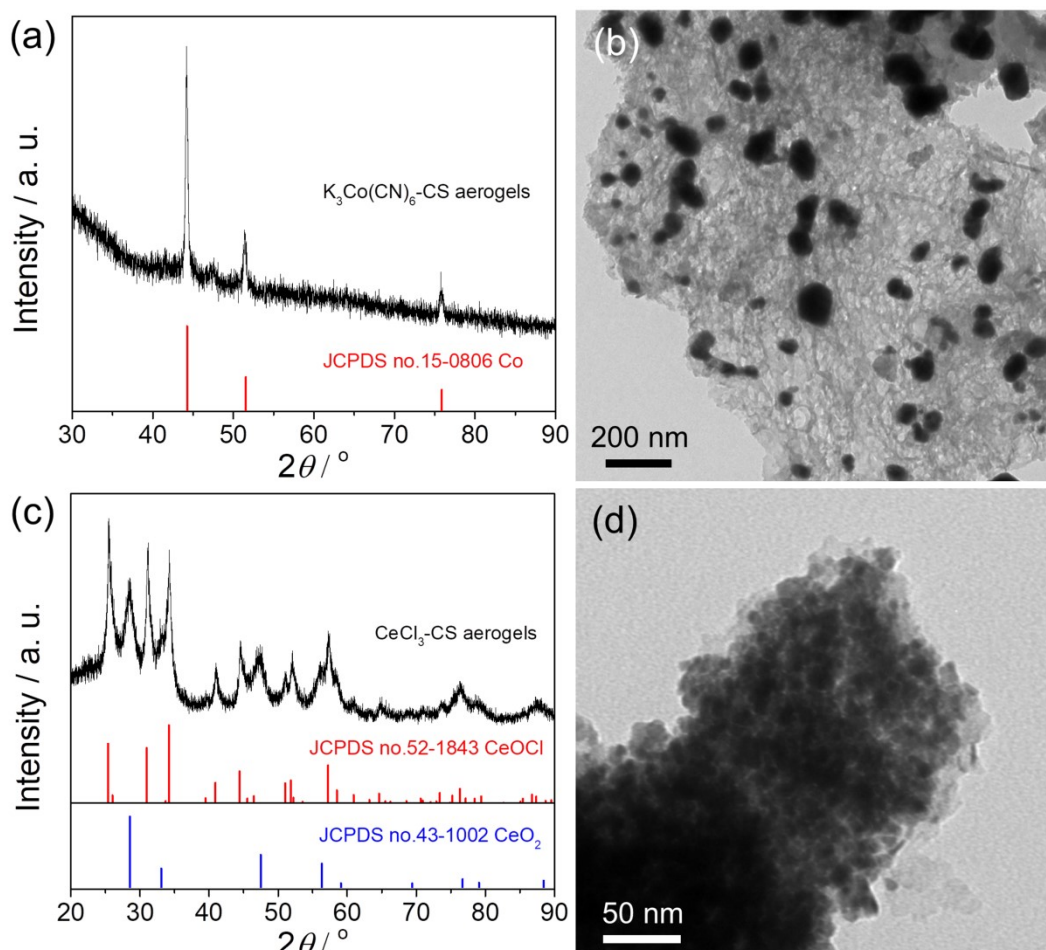

**Fig. S4** (a) XRD pattern and (b) TEM image of the Co/C aerogels. (c) XRD pattern and (d) TEM image of the CeO<sub>2</sub>/C aerogels.

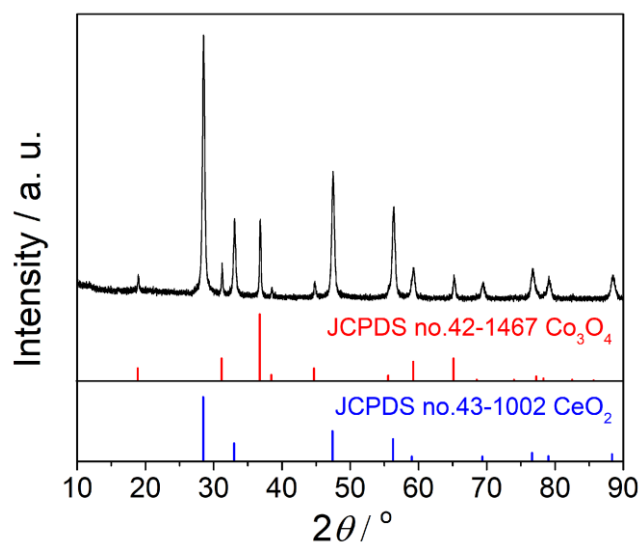

**Fig. S5** XRD pattern of the Co-CeO<sub>2</sub>/C aerogels after TGA measurement.

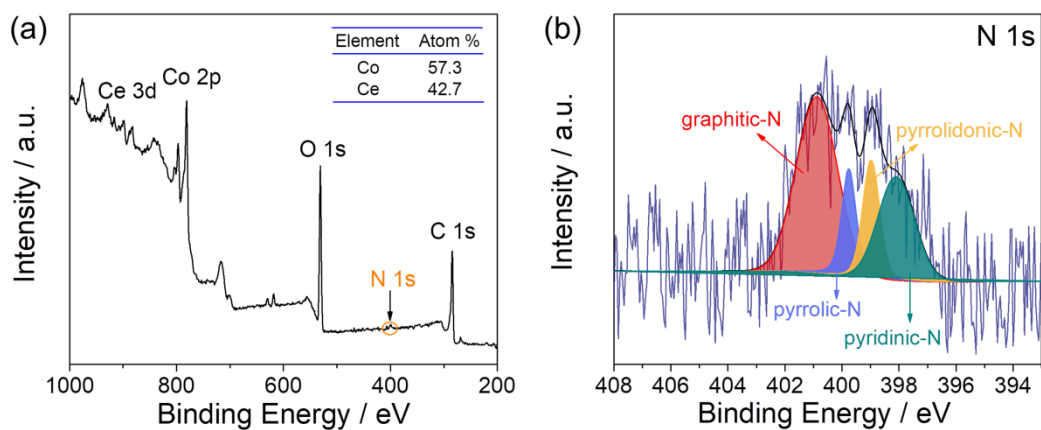

**Fig. S6** (a) XPS survey scan spectrum of the Co-CeO<sub>2</sub>/C aerogels. (b) High-resolution XPS spectrum of N 1s region in Co-CeO<sub>2</sub>/C aerogels.

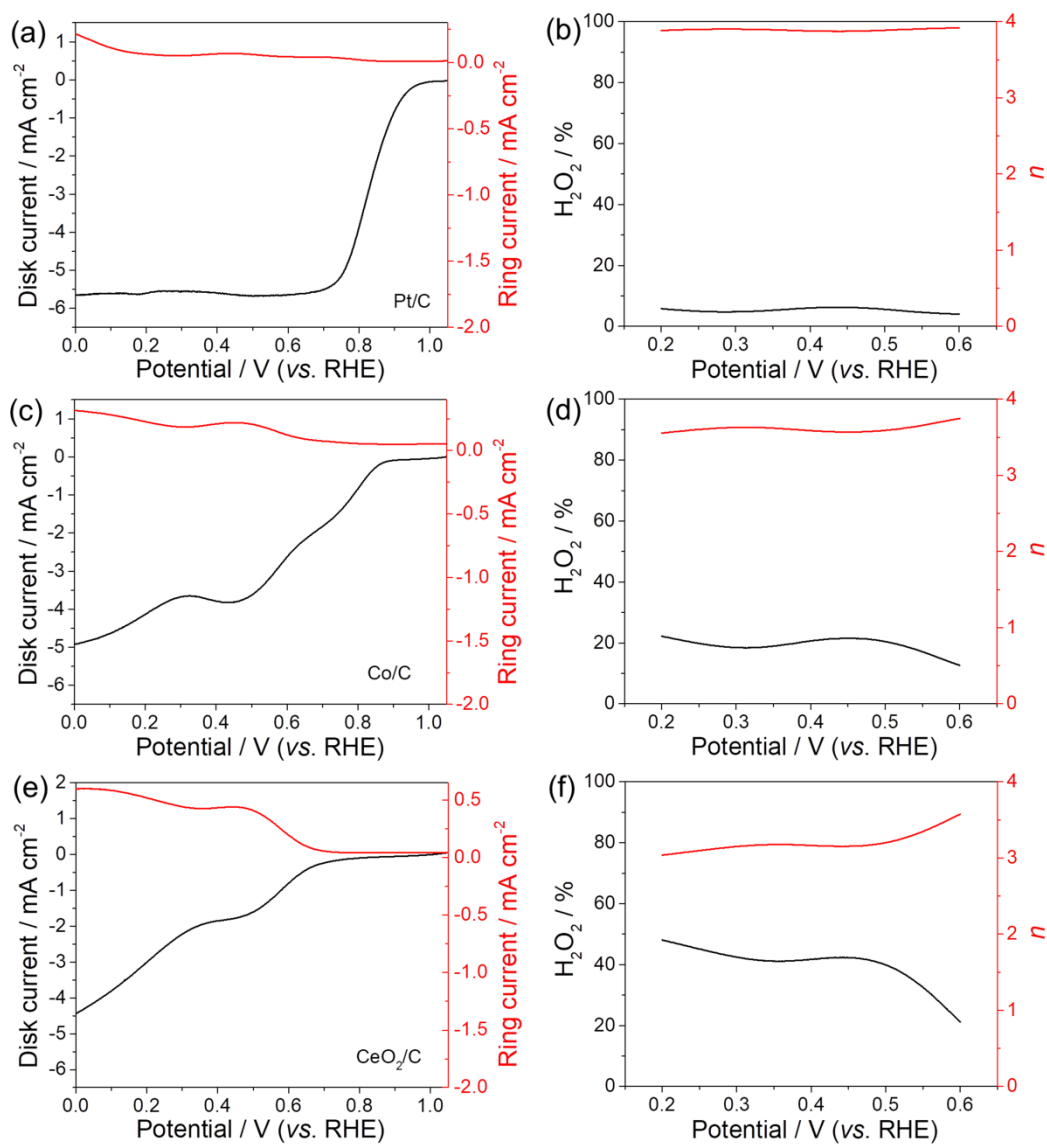

**Fig. S7** RRDE tests of (a-b) the commercial Pt/C catalysts, (c-d) the Co/C aerogels, and (e-f) the CeO<sub>2</sub>/C aerogels in O<sub>2</sub>-saturated 0.1 M KOH solution at a sweep rate of 5 mV s<sup>-1</sup> and a rotation rate of 1600 rpm: (a, c, e) polarization curves; (b, d, f) H<sub>2</sub>O<sub>2</sub> yield and electron transferred number  $n$ .

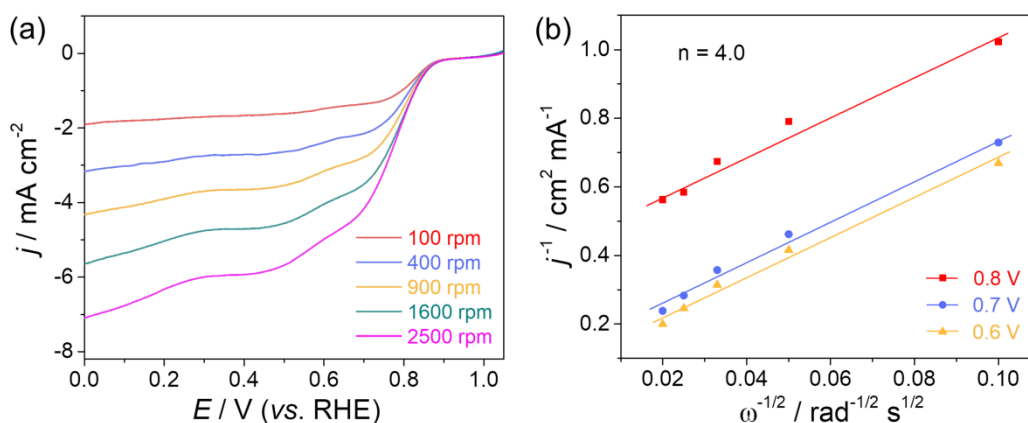

**Fig. S8** (a) Rotation rate-dependent current-potential curves. (b) Koutecky-Levich plots at different potentials for Co-CeO<sub>2</sub>/C aerogels.

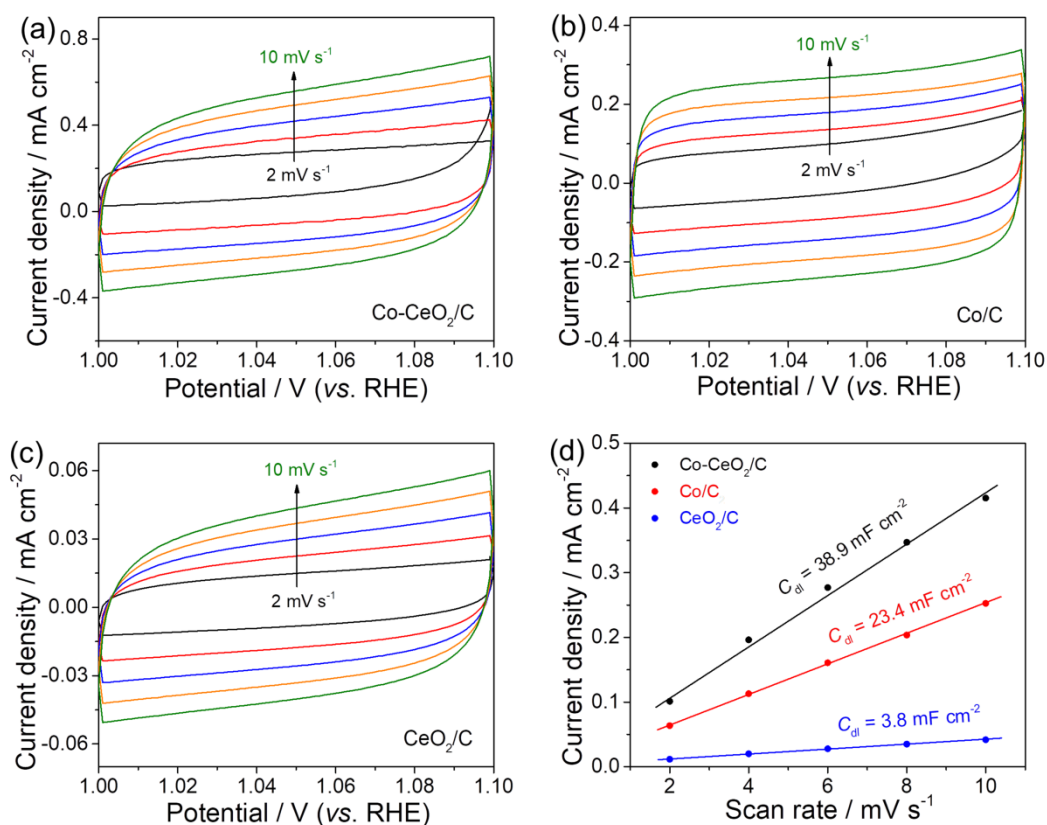

**Fig. S9** CVs of (a) Co-CeO<sub>2</sub>/C, (b) Co/C and (c) CeO<sub>2</sub>/C at different sweeping rates from 2 mV s<sup>-1</sup> to 10 mV s<sup>-1</sup> in 0.1 M KOH solution. (d) The  $C_{dl}$  values of Co-CeO<sub>2</sub>/C, Co/C and CeO<sub>2</sub>/C.



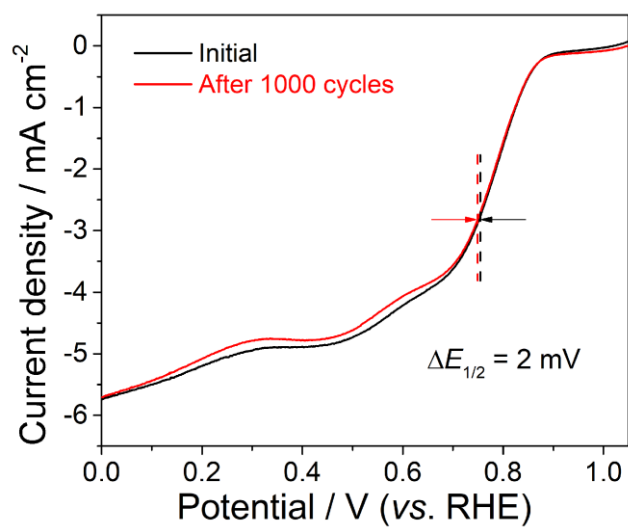

**Fig. S10** ORR polarization curves of the Co-CeO<sub>2</sub>/C aerogels before and after 1000 cycles.

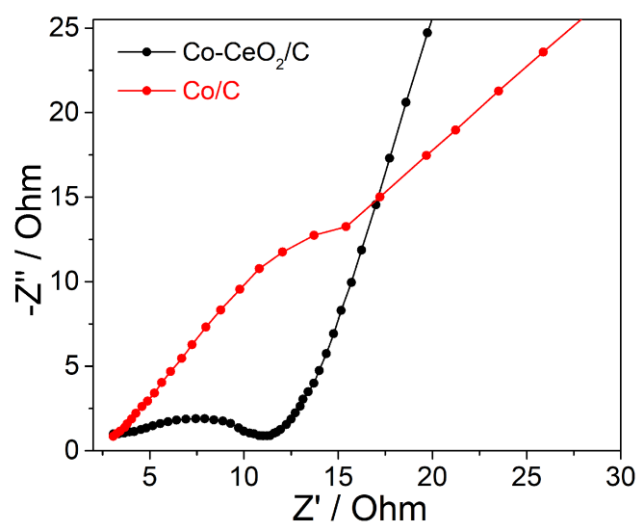

**Fig. S11** EIS Nyquist plots of the Co-CeO<sub>2</sub>/C aerogels and Co/C catalyst.

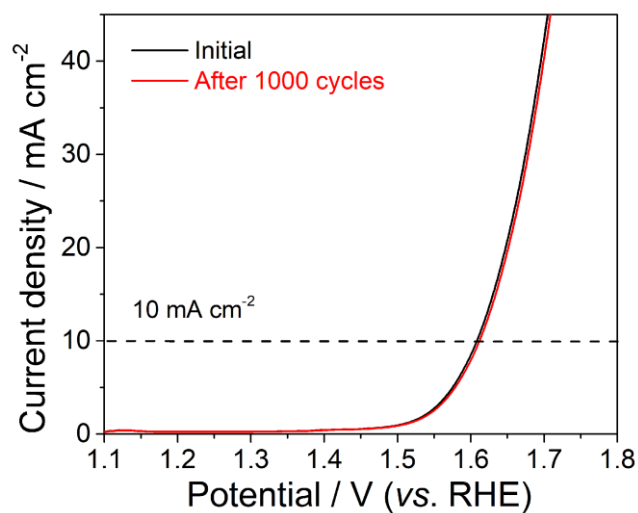

**Fig. S12** OER polarization curves of the Co-CeO<sub>2</sub>/C aerogels before and after 1000 cycles.

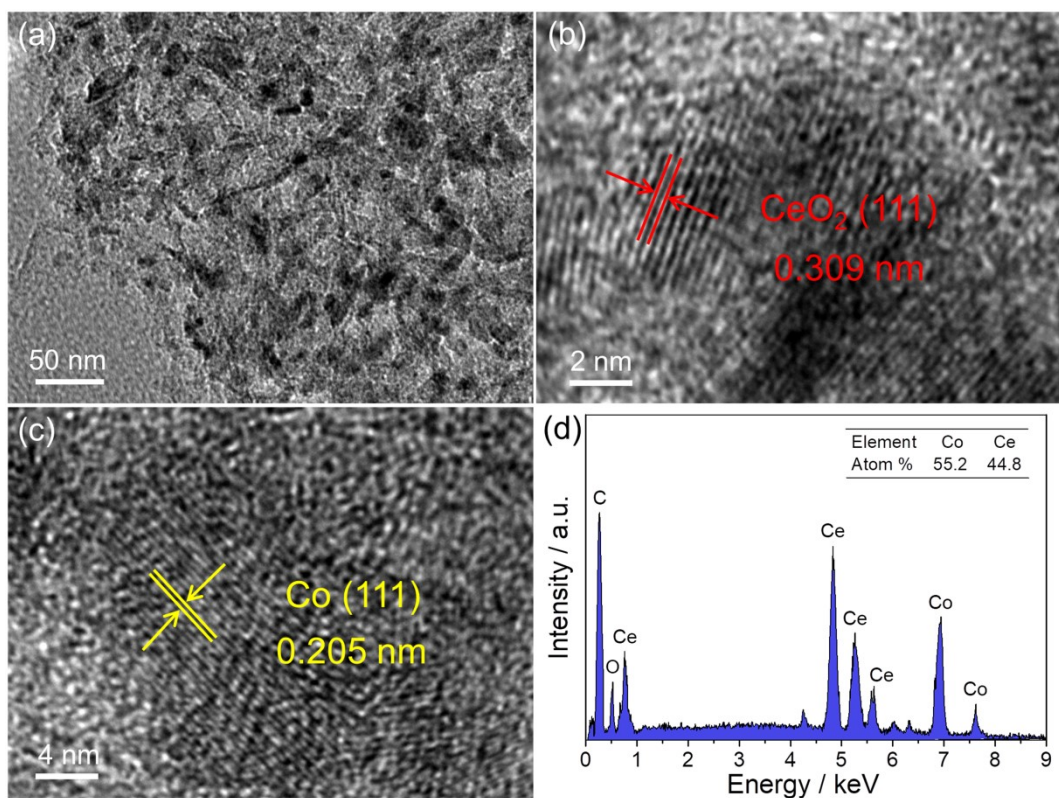

**Fig. S13** Morphological and compositional characterizations of the Co-CeO<sub>2</sub>/C aerogels after long duration test. (a) TEM image, (b-c) HRTEM images, and (d) EDX spectrum.

**Table S1.** Comparison of the ORR activity of the Co-CeO<sub>2</sub>/C aerogels with other electrocatalysts previously reported.

| Catalyst                                                            | $E_0 / V$ | $E_{1/2} / V$ | Electrolyte | Loadings<br>(mg cm <sup>-2</sup> ) | Ref                                        |
|---------------------------------------------------------------------|-----------|---------------|-------------|------------------------------------|--------------------------------------------|
| Co <sub>3</sub> O <sub>4</sub> /2.7Co <sub>2</sub> MnO <sub>4</sub> | 0.90      | 0.68          | 0.1 M KOH   | 0.09                               | Nanoscale 2013, 5, 5312.                   |
| NiCo <sub>2</sub> O <sub>4</sub> /G                                 | 0.89      | 0.56          | 0.1 M KOH   | 0.41                               | J. Mater. Chem. A 2013, 1, 4754.           |
| Co/N-C-800                                                          | 0.83      | 0.74          | 0.1 M KOH   | 0.25                               | Nanoscale 2014, 6, 15080.                  |
| CeGS                                                                | 0.90      | 0.81          | 0.1 M KOH   | 0.12                               | J. Mater. Chem. A 2017, 5, 6656.           |
| Co-NiO                                                              | 0.92      | 0.79          | 0.1 M KOH   | 0.20                               | Appl. Catal. B: Environ. 2019, 250, 71-77. |
| Co@NC-600                                                           | 0.94      | 0.835         | 0.1 M KOH   | 0.15                               | Nanoscale 2020, 12, 22718-22734.           |
| CoO <sub>x</sub> /CeO <sub>2</sub> /RGO                             | ~         | 0.83          | 0.1 M KOH   | 0.35                               | J. Energy Chem. 2021, 59, 615-625.         |
| Co porphyrins<br>1/CNTs                                             | ~         | 0.81          | 0.1 M KOH   | 0.25                               | J. Energy Chem. 2021, 53, 77-81.           |
| Co/C                                                                | 0.89      | 0.62          | 0.1 M KOH   | 0.255                              | This work                                  |
| CeO <sub>2</sub> /C                                                 | 0.80      | 0.30          | 0.1 M KOH   | 0.255                              | This work                                  |
| Co-CeO <sub>2</sub> /C                                              | 0.92      | 0.75          | 0.1 M KOH   | 0.255                              | This work                                  |

**Table S2.** Comparison of the OER activity of the Co-CeO<sub>2</sub>/C aerogels with other electrocatalysts previously reported.

| Catalyst                                                            | Overpotential / V<br>(10 mA cm <sup>-2</sup> ) | Electrolyte | Loadings<br>(mg cm <sup>-2</sup> ) | Ref                                   |
|---------------------------------------------------------------------|------------------------------------------------|-------------|------------------------------------|---------------------------------------|
| Co <sub>3</sub> O <sub>4</sub> /2.7Co <sub>2</sub> MnO <sub>4</sub> | 0.54                                           | 0.1 M KOH   | 0.09                               | Nanoscale 2013, 5, 5312.              |
| NiCo <sub>2</sub> O <sub>4</sub> -graphene                          | 0.46                                           | 0.1 M KOH   | 2.00                               | ACS Nano 2013, 7, 10190.              |
| Co@Co <sub>3</sub> O <sub>4</sub> /NC-1                             | 0.42                                           | 0.1 M KOH   | 0.21                               | Angew. Chem. 2016, 55, 4087.          |
| LaCoO <sub>3</sub>                                                  | 0.49                                           | 0.1 M KOH   | ~                                  | Nat. Common. 2016, 7, 11510.          |
| NiCo@N-C 2                                                          | 0.53                                           | 0.1 M KOH   | 0.4                                | Adv. Funct. Mater. 2018, 28, 1705094. |
| NiCo@N-C 3                                                          | 0.55                                           | 0.1 M KOH   | 0.4                                | Adv. Funct. Mater. 2018, 28, 1705094. |
| CoO <sub>x</sub> /CeO <sub>2</sub> /RGO                             | 0.36                                           | 0.1 M KOH   | 0.35                               | J. Energy Chem. 2021, 59, 615-625.    |
| Co porphyrins<br>1/CNTs                                             | 0.407                                          | 1 M KOH     | 0.25                               | J. Energy Chem. 2021, 53, 77-81.      |
| Co/C                                                                | 0.58                                           | 0.1 M KOH   | 0.255                              | This work                             |
| CeO <sub>2</sub> /C                                                 | 0.60                                           | 0.1 M KOH   | 0.255                              | This work                             |
| Co-CeO <sub>2</sub> /C                                              | 0.38                                           | 0.1 M KOH   | 0.255                              | This work                             |
